# Supplementary material for: Interplay of m6A and H3K27 trimethylation restrains inflammation during bacterial infection
Source: PubMed Central journal article supplement — Sci Adv. 2020 Aug 19;6(34):eaba0647. doi: 10.1126/sciadv.aba0647 (PMC7438091; doi:10.1126/sciadv.aba0647), 2020-08-19
Supplement: aba0647_SM.pdf [file aba0647_SM.pdf]

## Supplementary Materials for

### **Interplay of m<sup>6</sup>A and H3K27 trimethylation restrains inflammation during bacterial infection**

Chenglei Wu, Weixin Chen, Jincan He, Shouheng Jin, Yukun Liu, Yang Yi, Zhuoxing Gao, Jiayan Yang, Jianhua Yang\*, Jun Cui\*, Wei Zhao\*,

\*Corresponding author. Email: [zhaowei23@mail.sysu.edu.cn](mailto:zhaowei23@mail.sysu.edu.cn) (W.Z.); [cuij5@mail.sysu.edu.cn](mailto:cuij5@mail.sysu.edu.cn) (J.C.); [yangjh7@mail.sysu.edu.cn](mailto:yangjh7@mail.sysu.edu.cn) (Jianhua Yang)

Published 19 August 2020, *Sci. Adv.* **6**, eaba0647 (2020)  
DOI: 10.1126/sciadv.aba0647

#### **The PDF file includes:**

Figs. S1 to S7  
Table S1  
Legends for data files S1 and S2

#### **Other Supplementary Material for this manuscript includes the following:**

(available at [advances.sciencemag.org/cgi/content/full/6/34/eaba0647/DC1](https://advances.sciencemag.org/cgi/content/full/6/34/eaba0647/DC1))

Data files S1 and S2

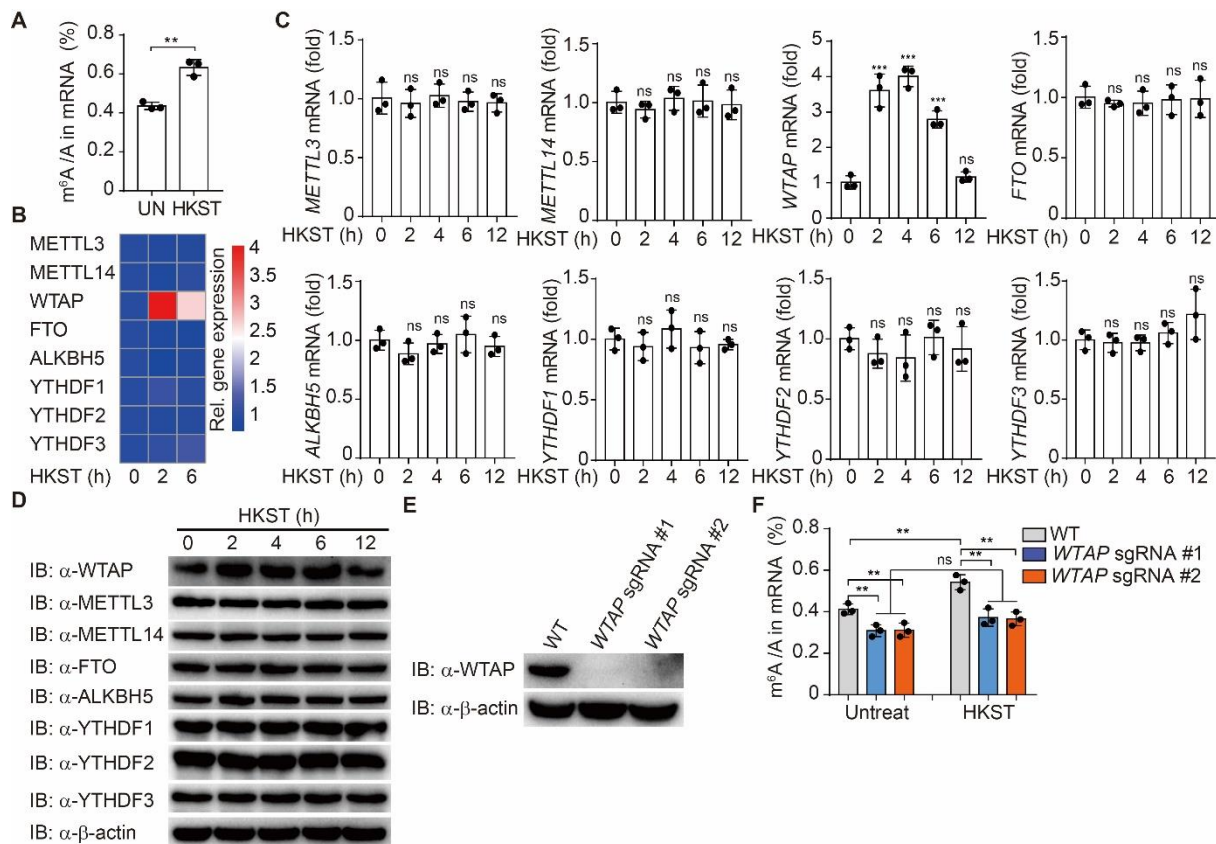

**fig. S1. Expression of WTAP is upregulated during bacterial infection.** (A) THP-1 cells were exposed to HKST, and the m<sup>6</sup>A level on poly(A) RNA was quantified using an m<sup>6</sup>A RNA methylation detection kit. (B) RNA-seq analyses showing the relative mRNA expression levels of genes encoding for m<sup>6</sup>A modulators in THP-1 cells upon HKST treatment. (C) Real-time PCR analyses for mRNA expression of the genes encoding for m<sup>6</sup>A modulators in THP-1 cells upon HKST treatment. (D) Immunoblot analysis of m<sup>6</sup>A modulators in THP-1 cells stimulated with HKST. (E) Immunoblot analysis of cell extracts from wild-type (WT) and *WTAP* knockout (KO) THP-1 cells with the indicated antibodies. (F) WT and *WTAP* KO THP-1 cells were exposed to HKST, and the m<sup>6</sup>A levels on poly(A) RNA were quantified using an m<sup>6</sup>A quantification kit. Data (A, C and F) are combined from three individual experiments with triplicate and presented as means  $\pm$  SEM. \**P* < 0.05, \*\**P* < 0.01, and \*\*\**P* < 0.001 compared to control cells (Student's t-test). Data (D and E) are representatives of three independent experiments with similar results. Representative blots are shown.

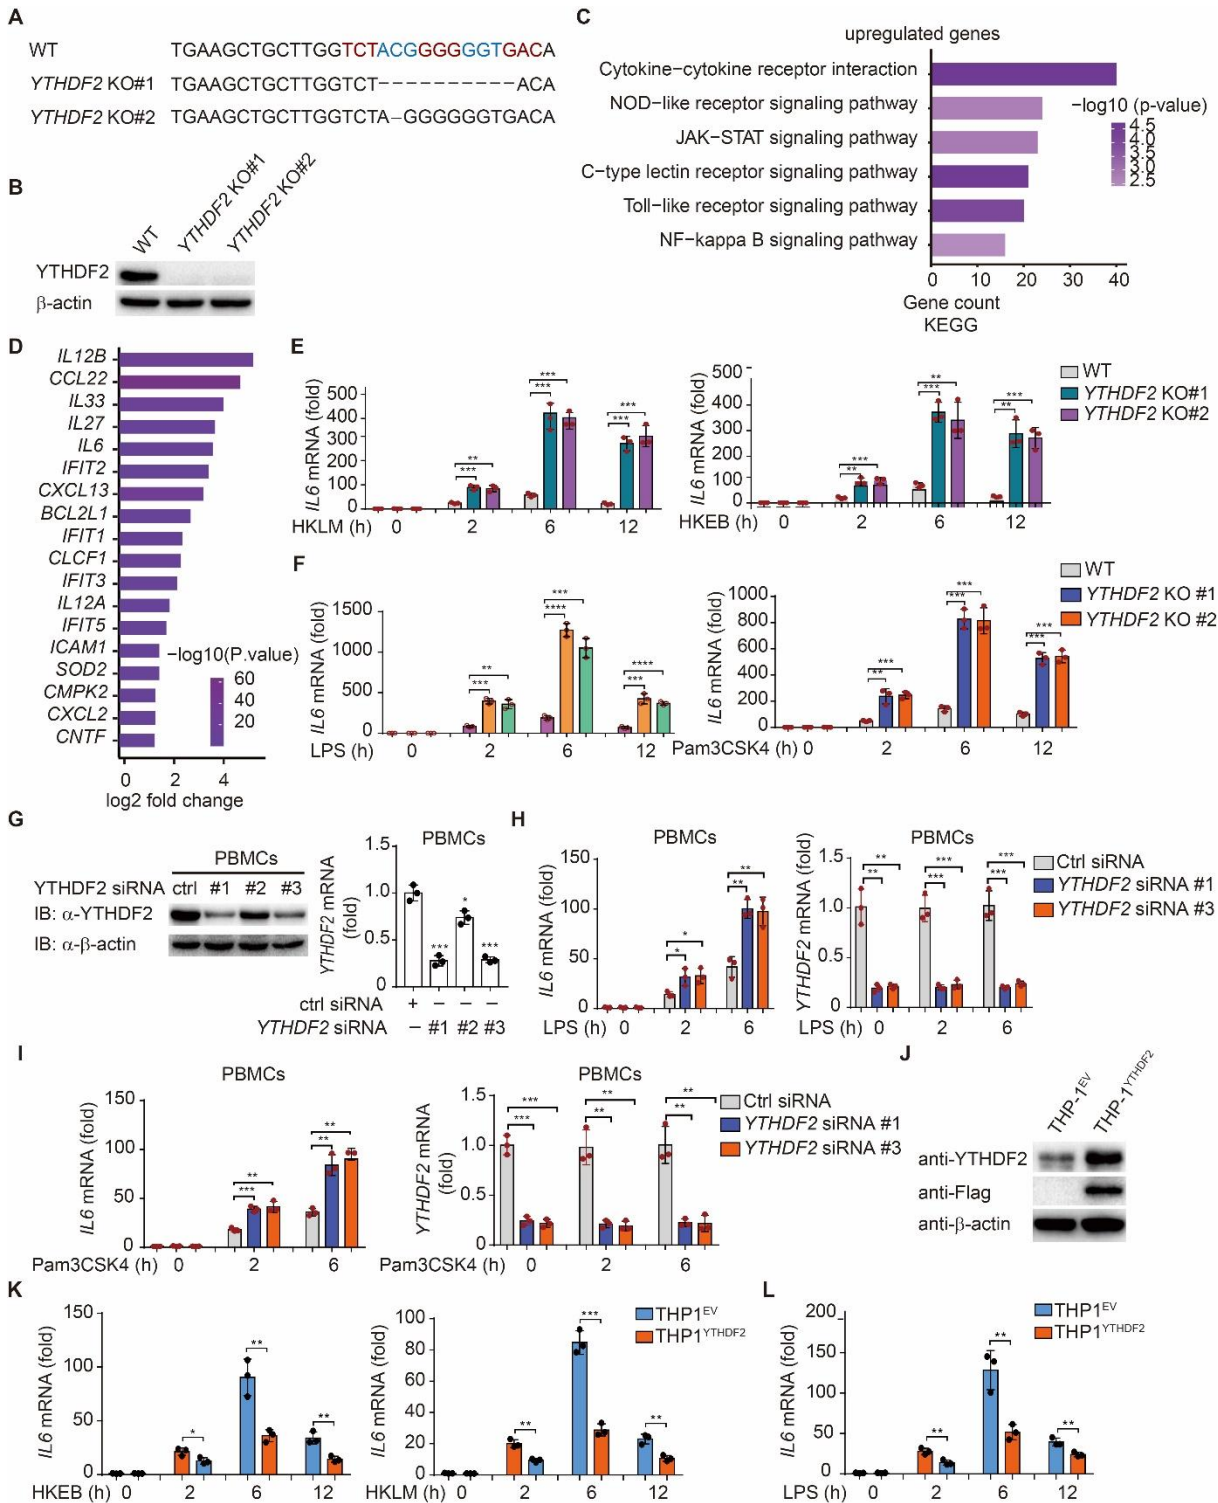

**fig. S2. YTHDF2 inhibits the transcription and production of IL-6.** (A and B) Sequence and immunoblotting analysis of WT and *YTHDF2* knockout (KO) THP-1 cells. (C) Kyoto Encyclopedia of Genes and Genomes (KEGG) analysis of the 1,606 upregulated genes in *YTHDF2* KO cells, compared to those in wild type (WT) cells after HKST infection. (D) Fold change of inflammatory related genes mRNA expression in *YTHDF2* KO cells versus WT THP-1 cells with HKST stimulation according to RNA-seq data. (E) WT and *YTHDF2* KO THP-1 cells were infected

with HKLM or HKEB for indicated periods, then analyzed by real-time PCR for *IL-6* transcription. **(F)** WT and *YTHDF2* KO THP-1 cells were stimulated with LPS (200 ng/ml) or Pam3CSK4(100 ng/ml) for indicated periods, then analyzed by real-time PCR for *IL-6* transcription. **(G)** Immunoblotting and real-time PCR analysis of *YTHDF2* in PBMCs transfected with the indicated *YTHDF2* siRNAs. **(H and I)** PBMCs were transfected with *YTHDF2* siRNAs or control siRNA for 48 h. These cells were stimulated with LPS (200 ng/ml) and Pam3CSK4 (100 ng/ml) for indicated periods and analyzed by real-time PCR for *IL6* and *YTHDF2* expression. **(J)** Immunoblot analysis of *YTHDF2* in wild type (WT) THP-1 cells stably expressing the empty vector (THP-1<sup>EV</sup>) or Flag-tagged *YTHDF2* (THP-1<sup>YTHDF2</sup>). **(K and L)** THP-1<sup>EV</sup> and THP-1<sup>YTHDF2</sup> cells were stimulated with HKEB, HKLM and LPS (200 ng/ml) for indicated periods and detected *IL-6* expression by real-time PCR. Data **(A, E, F, G, H, I and K, L)** are combined from three individual experiments with triplicate and presented as means  $\pm$  SEM. \*P < 0.05, \*\* P < 0.01, and \*\*\* P < 0.001 compared to control cells (Student's t-test). Data **(B, G and J)** are representatives of three independent experiments with similar results. Representative blots are shown.

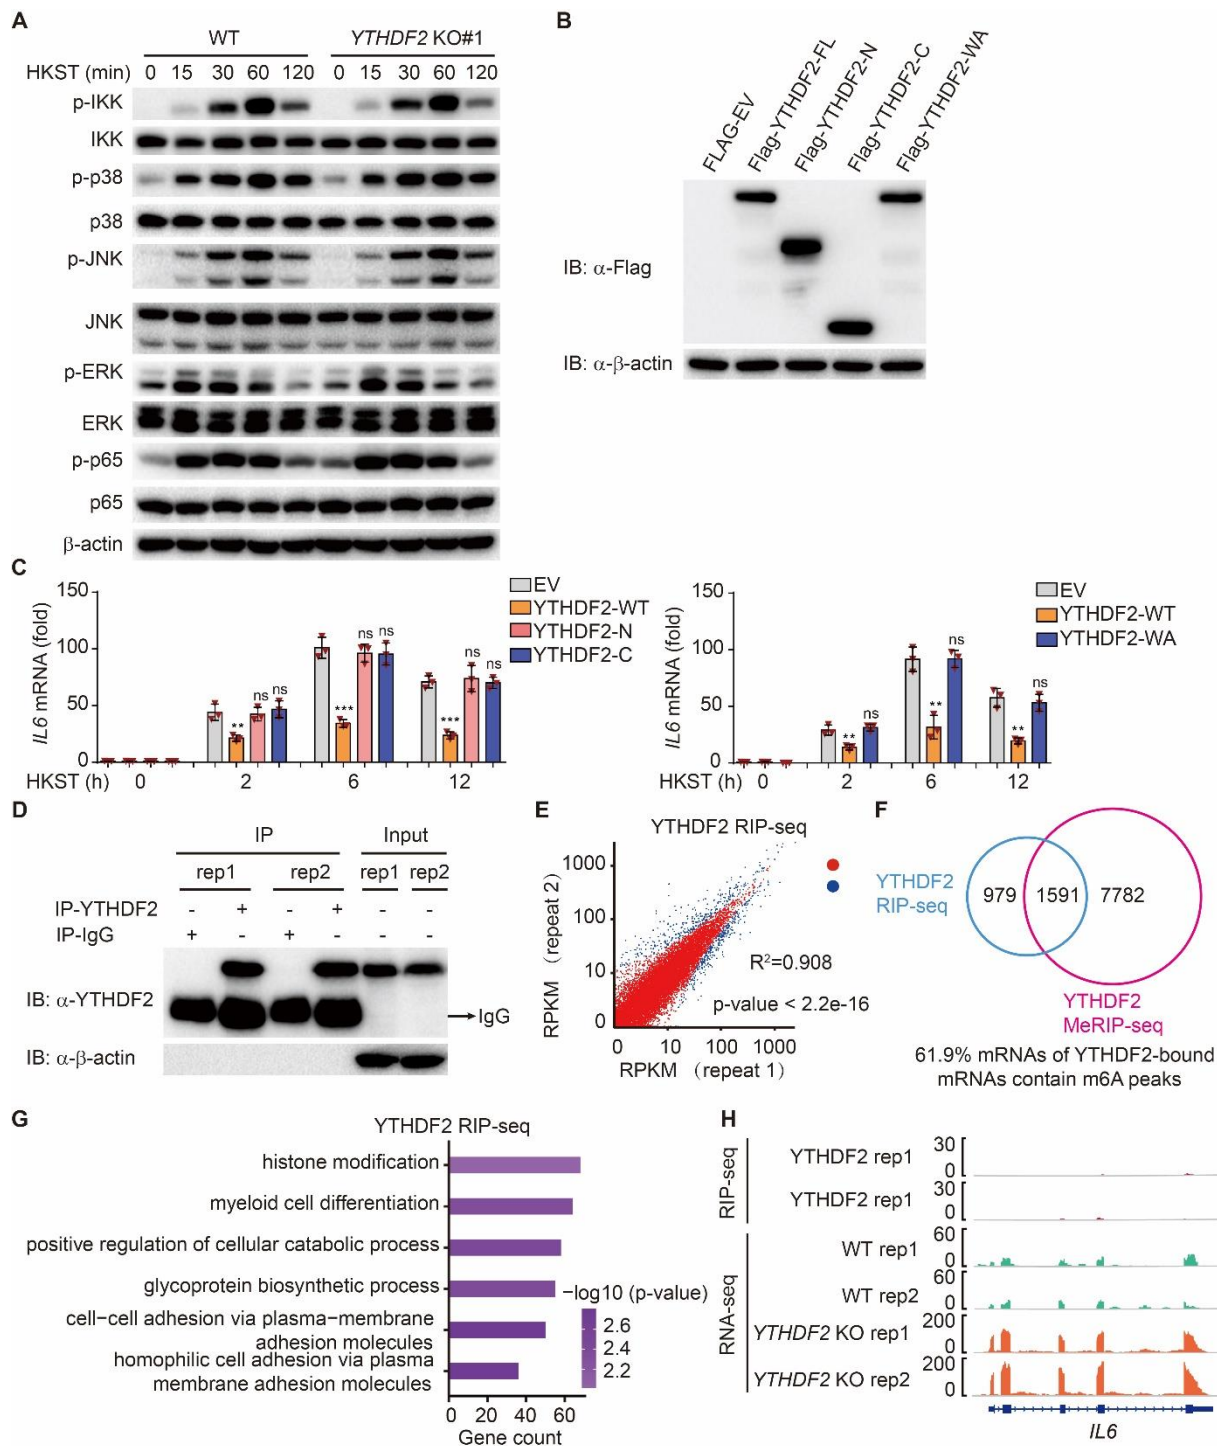

**fig. S3. YTHDF2 functions as m<sup>6</sup>A reader to bind to histone modification associated genes.**

(A) Wild type (WT) and *YTHDF2* knockout (KO) THP-1 cells were stimulated with HKST for indicated periods, then the cell lysates were analyzed by immunoblot indicated antibodies. (B) Immunoblotting analysis of cell extracts from THP-1 cells stably expressing Flag-tagged full-length *YTHDF2* (FL), *YTHDF2* N/C-terminal truncation mutants or the sites mutant. (C) THP-1<sup>EV</sup>, THP-1<sup>YTHDF2-FL</sup>, THP-1<sup>YTHDF2-N</sup>, and THP-1<sup>YTHDF2-C</sup> cells and THP-1<sup>YTHDF2-WA</sup> cells were treated with HKST in different time points, then analyzed *IL-6* transcription by real-time PCR. (D) THP-1 cells

were exposed to for 6 h, and the cell lysates were subjected to RNA immunoprecipitation (RIP) with an anti-YTHDF2 antibody or control IgG, followed by immunoblotting with indicated antibodies. **(E)** Correlation matrix plot of two replicates of YTHDF2-RIP-seq samples. **(F)** Overlap of transcripts identified by RIP-seq of YTHDF2 and m<sup>6</sup>A-seq data in HKST stimulated THP-1 cells. **(G)** GO analysis of most enriched YTHDF2-bound mRNA in infected THP-1 cells from YTHDF2-RIP-seq data. **(H)** Genome browser tracks showing *IL6* transcript reads from RIP-seq and RNA-seq data. Data **(A, B and D)** are representatives of three independent experiments with similar results. Data **(C)** are plotted as mean  $\pm$  SEM of combined from three independent experiments with triplicate. \*P < 0.05, \*\* P < 0.01, and \*\*\* P < 0.001 compared to control cells (Student's t-test).

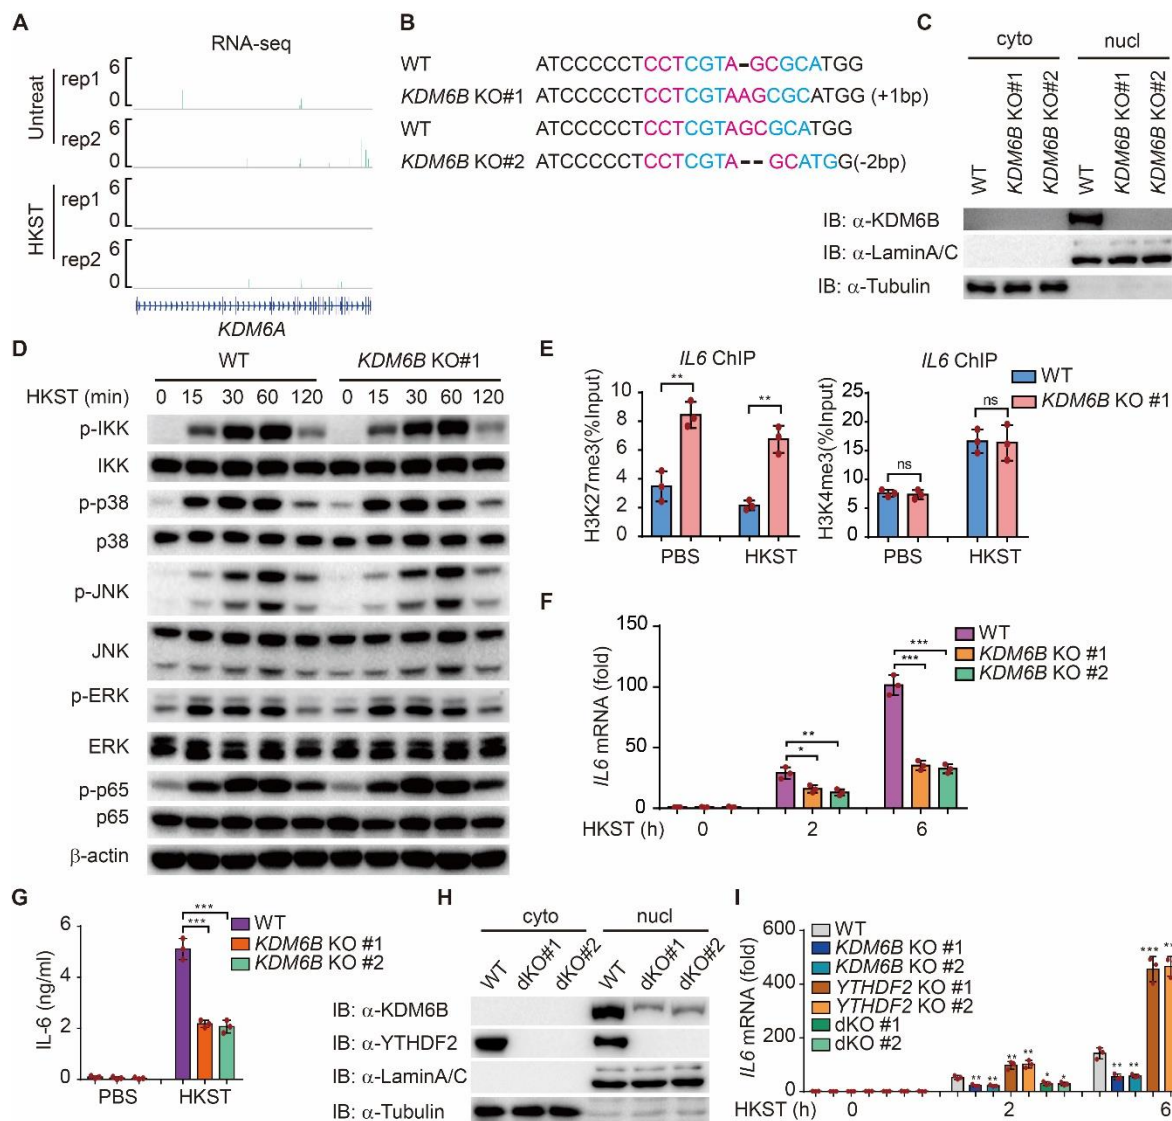

**fig. S4. YTHDF2 decreases the transcription of *IL6* in a *KDM6B*-dependent manner.** (A) Genome browser tracks showing *KDM6A* transcript reads from RNA-seq data. (B and C) Sequence and immunoblotting analysis of cells extracts from wild type (WT) and *KDM6B* knockout (KO) THP-1 cells. (D) WT and *KDM6B* KO THP-1 cells were stimulated with HKST for indicated periods, then the cell lysates were analyzed by immunoblot with indicated antibodies. (E) ChIP-qPCR assay for H3K27me3 and H3K4me3 at *IL-6* gene promoter loci in WT and *KDM6B* KO THP-1 cells in response to HKST or not. (F) The transcription of *IL6* measured by real-time PCR in WT and *KDM6B* KO THP-1 cells treated with HKST for indicated periods. (G) WT and *KDM6B* KO cells were stimulated with HKST for 24 h before the supernatants were collected. The production of IL-6 was analyzed by ELISAs. (H) Generate *KDM6B* and *YTHDF2* double knockout (dKO) THP-1 cell lines. (I) The transcription level of *IL-6* were analyzed by real-time PCR in WT, *KDM6B* KO, *YTHDF2* KO, or dKO THP-1 cells infected with HKST for the indicated periods. Data (D and H) are representatives of three independent experiments with similar results. Data (E

to **G** and **I**) are plotted as mean  $\pm$  SEM of combined from three independent experiments with triplicate. \*P < 0.05, \*\* P < 0.01, and \*\*\* P < 0.001 compared to control cells (Student's t-test).



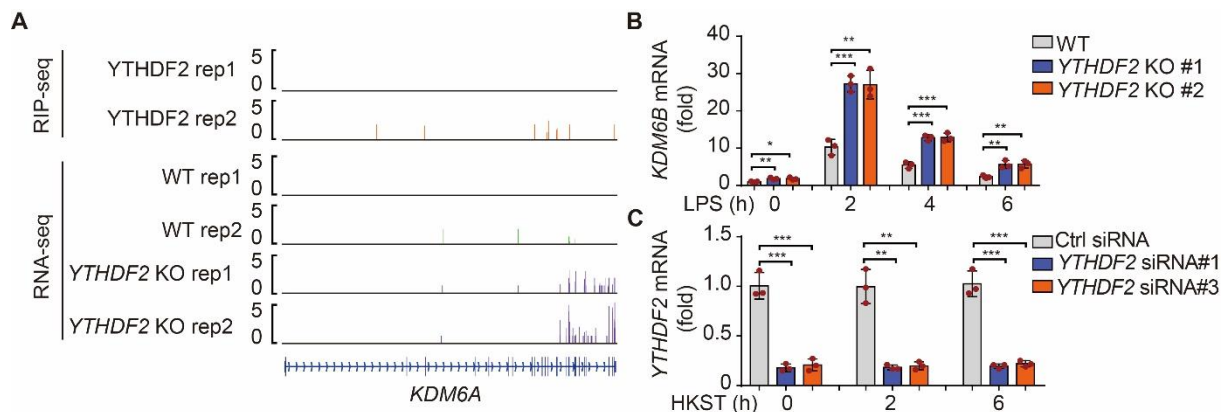

**fig. S5. YTHDF2 decays *KDM6B* transcript.** (A) Genome browser tracks displaying YTHDF2-RIP-seq (upper panels, two replicates) and RNA-seq (lower panels, two replicates) reads distribution in *KDM6A* mRNA of wild type (WT) and *YTHDF2* knockout (KO) THP-1 cells with HKST infection. (B) WT and *YTHDF2* KO THP-1 cells were stimulated with LPS (200 ng/ml) for indicated periods, then analyzed by real-time PCR for *KDM6B* transcription. (C) Transfected the indicated *YTHDF2* siRNA into PBMCs for 24h, and analyzed *YTHDF2* expression after stimulated with HKST for indicated periods. Data (B and C) are combined from three individual experiments with triplicate and presented as means  $\pm$  SEM. \* $P < 0.05$ , \*\* $P < 0.01$ , and \*\*\* $P < 0.001$  compared to control cells (Student's t-test).

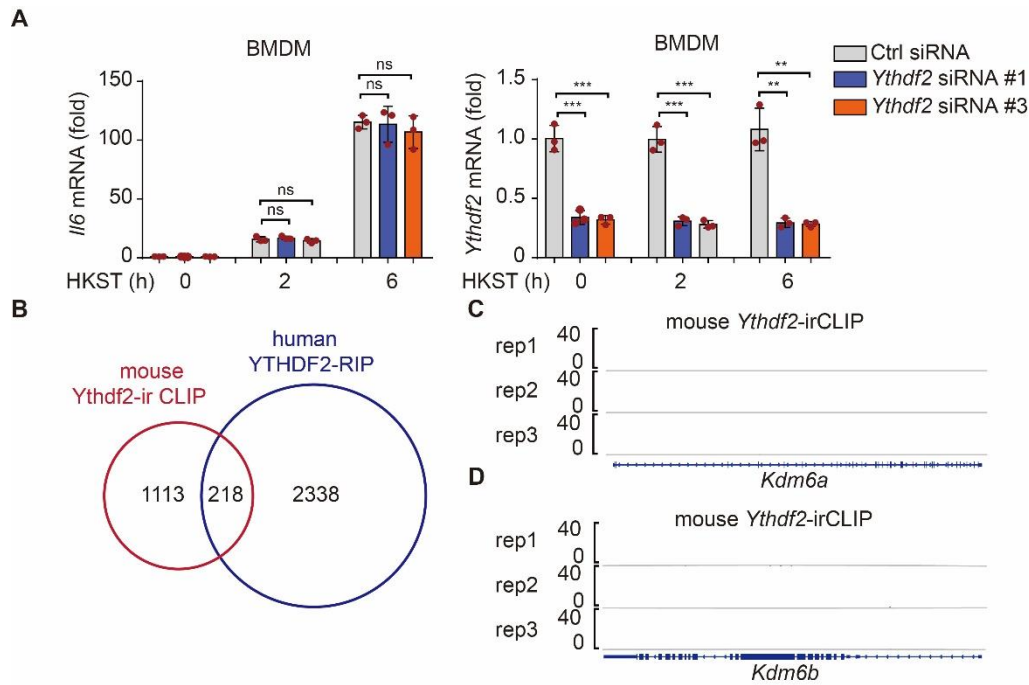

**fig. S6. The regulation of Il-6 production by Ythdf2 is not conserved in mice.** (A) Murine bone marrow derived macrophages (BMDMs) that were transfected with *Ythdf2* siRNAs or control siRNA for 48h were stimulated with HKST for indicated periods, then analyzed by real-time PCR for *Il6* and *Ythdf2* expression. (B) Venn diagram displaying that there were a few overlapped transcripts bound to YTHDF2 between human and mouse according infrared crosslinking-immunoprecipitation-sequencing (irCLIP-seq) data and RIP-seq data. (C and D) IGV browser tracks of *Kdm6a* and *Kdm6b* mRNA in mouse *Ythdf2*-irCLIP data. Data (A) are combined from three individual experiments with triplicate and presented as means  $\pm$  SEM. \* $P < 0.05$ , \*\* $P < 0.01$ , and \*\*\* $P < 0.001$  compared to control cells (Student's t-test).

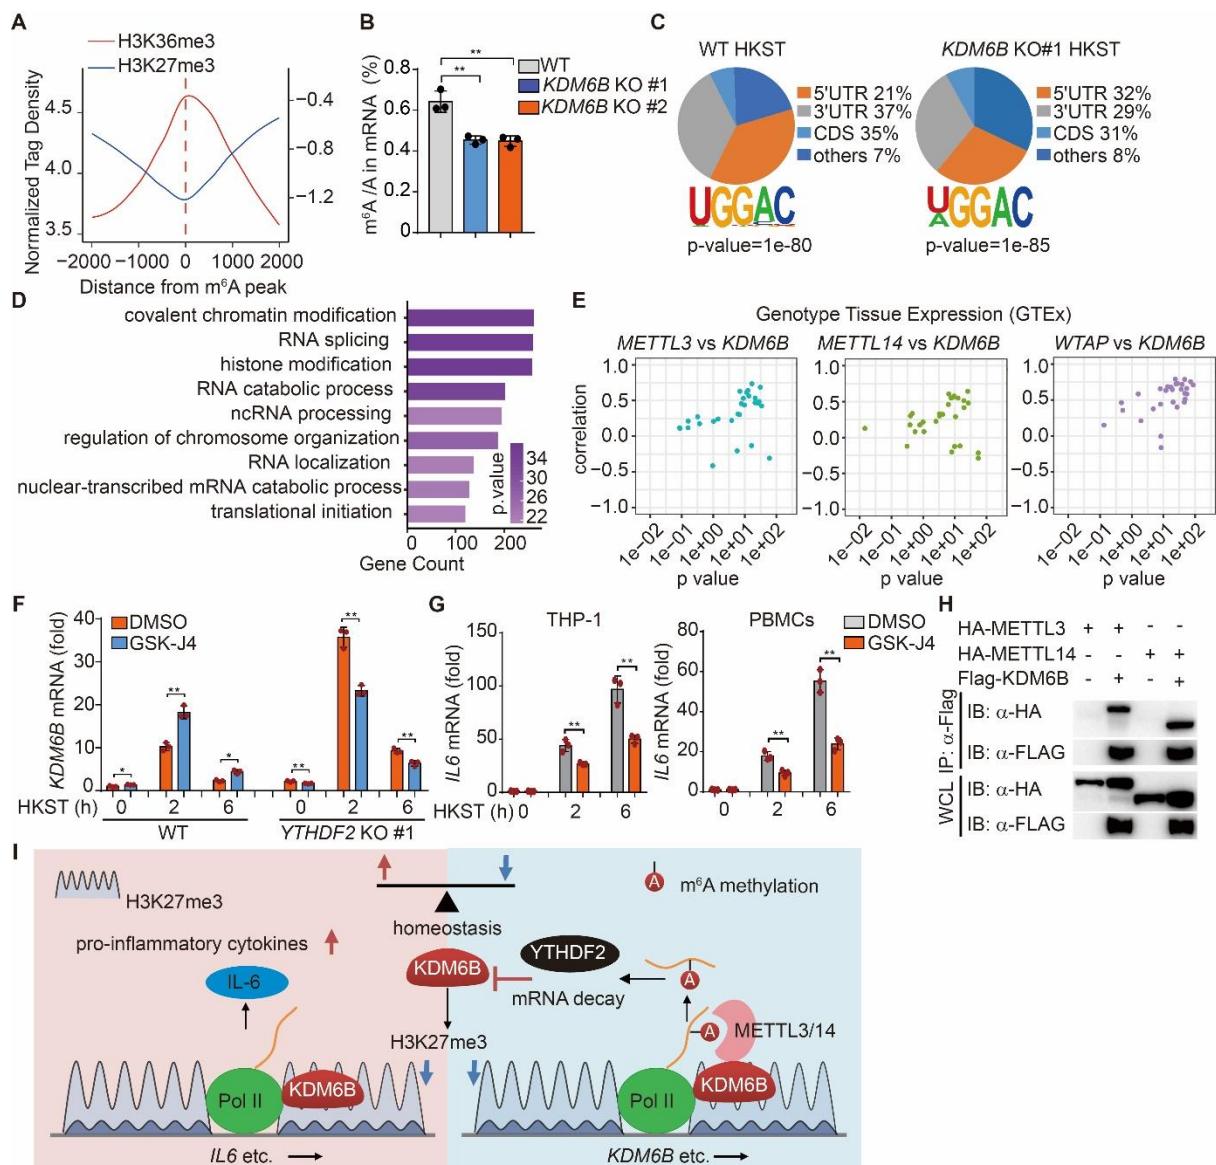

**fig. S7. KDM6B promotes m<sup>6</sup>A modification via recruiting m<sup>6</sup>A methyltransferase complex.** (A) Distance of H3K27me3 and H3K36me3 signals to the nearest m<sup>6</sup>A peaks. (B) WT and *KDM6B* KO THP-1 cells were exposed to HKST, and the m<sup>6</sup>A level on poly(A) RNA was quantified using an m<sup>6</sup>A RNA methylation detection kit. (C) Pie chart depicting the proportion of m<sup>6</sup>A peak distribution in the 5'UTR, CDS, and 3'UTR regions in WT and *KDM6B* KO THP-1 cells infected with HKST. (D) GO analysis of genes that contained hypomethylated m<sup>6</sup>A peaks in HKST infected *KDM6B* KO THP-1 cells compared with WT THP-1 cells. (E) Correlation of *KDM6B* with individual m<sup>6</sup>A methyltransferase complex genes (that is, *METTL3*, *METTL14* and *WTAP*) in expression in normal tissues. (F) WT or *YTHDF2* KO THP-1 cells were treated with DMSO or GSK-J4 for 24h, and then infected with HKST for indicated periods. The transcription of *KDM6B* mRNA was measured by real-time PCR. (G) Detection of the transcription of *IL6* by real-time PCR in THP-1 cells or PBMCs treated with DMSO or GSK-J4 exposed to HKST for indicated periods.

**(H)** HeLa cells were transfected with HA-tagged *METTL3* or *METTL14* and Flag-tagged *KDM6B*. The cell lysates were subjected to immunoprecipitation with anti-Flag antibodies and immunoblotted with the indicated antibodies. **(I)** A Schematic model illustrating how YTHDF2 controls inflammatory response and how KDM6B facilitates m<sup>6</sup>A deposition via recruiting m<sup>6</sup>A methyltransferase complex. Data **(B, F and G)** are plotted as mean  $\pm$  SEM of combined three independent experiments with triplicate. \*P < 0.05, \*\* P < 0.01, and \*\*\* P < 0.001 compared to control cells (Student's t-test). Data **(H)** are representatives of three independent experiments with similar results.

**Supplementary Table 1. Oligos of this article**

| sgRNAs and siRNAs used for this study |                                 |                         |
|---------------------------------------|---------------------------------|-------------------------|
| Human YTHDF2 sgRNA #1                 | GTGAAGCTGCTTGGTCTACG            |                         |
| Human YTHDF2 sgRNA #2                 | TGAAGCTGCTTGGTCTACGG            |                         |
| Human KDM6B sgRNA #1                  | ATCCCCCTCCTCGTAGCGCA            |                         |
| Human KDM6B sgRNA #2                  | CCAGGCAGCCATGCGCTACG            |                         |
| Human WTAP sgRNA #1                   | CTTGGGAAGAGGTTCTTCGT            |                         |
| Human WTAP sgRNA #2                   | GCATATGTACAAGCTTTGGA            |                         |
| Human YTHDF2 siRNA #1                 | sense:GUGCAUACAGUUUUCUCUA       |                         |
|                                       | anti-sense:CACGUAUGUCAAAAAGAGAU |                         |
| Human YTHDF2 siRNA #2                 | sense:CACUCCUACCAGAUGCAA        |                         |
|                                       | anti-sense:GUGAAGGAUGGUCUACGUU  |                         |
| Human YTHDF2 siRNA #3                 | sense:CAGUGUUGGAGAAGCUUCG       |                         |
|                                       | anti-sense:GUCACAACCUCUUCGAAGC  |                         |
| Mouse YTHDF2 siRNA #1                 | sense:GUGGGUCCAUCACUAGUAA       |                         |
|                                       | anti-sense:UUACUAGUGAUGGACCCAC  |                         |
| Mouse YTHDF2 siRNA #2                 | sense:GGACAGCAGGCCAAUAAUA       |                         |
|                                       | anti-sense:UAUUAUUGGCCUGCUGUCC  |                         |
| Mouse YTHDF2 siRNA #3                 | sense:CGGUCCAUUAUAACUUA         |                         |
|                                       | anti-sense:UAUAGUUAUUAUUGGACCG  |                         |
| Primers of Real-time PCR              |                                 |                         |
| Human IL-6                            | Forward                         | AGAGGCACTGGCAGAAAACAAC  |
|                                       | Reverse                         | AGGCAAGTCTCCTCATTGAATCC |
| Human KDM6B                           | Forward                         | TGATGCTAAGCGGTGGAAG     |
|                                       | Reverse                         | TGTTGATGTTGACGGAGCAG    |
| Human ACTB                            | Forward                         | ACCATGTACCCTGGCATTGC    |
|                                       | Reverse                         | CGGACTCGTCATACTCCTGC    |
| Human CCL22                           | Forward                         | ATCGCCTACAGACTGCACTC    |
|                                       | Reverse                         | GACGGTAACGGACGTAATCAC   |
| Human IL12B                           | Forward                         | GCGGAGCTGCTACACTCTC     |
|                                       | Reverse                         | CCATGACCTCAATGGGCAGAC   |
| Human METTL3                          | Forward                         | CATTGCCCACTGATGCTGTG    |
|                                       | Reverse                         | AGGCTTCTACCCCATCTTGA    |
| Human METTL14                         | Forward                         | AGTGCCGACAGCATTGGTG     |
|                                       | Reverse                         | GGAGCAGAGGTATCATAGGAAGC |
| Human WTAP                            | Forward                         | CTTCCAAGAAGGTTTCGATTGA  |
|                                       | Reverse                         | TCAGACTCTCTTAGGCCAGTTAC |
| Human FTO                             | Forward                         | ACTTGGCTCCCTTATCTGACC   |

|                       |         |                                  |
|-----------------------|---------|----------------------------------|
|                       | Reverse | TGTGCAGTGTGAGAAAGGCTT            |
| Human ALKBH5          | Forward | AGTTCAGTTCAAGCCTATTCG            |
|                       | Reverse | TGAGCACAGTCACGCTTCC              |
| Human YTHDF1          | Forward | ACCTGTCCAGCTATTACCCG             |
|                       | Reverse | TGGTGAGGTATGGAATCGGAG            |
| Human YTHDF2          | Forward | CCTTAGGTGGAGCCATGATTG            |
|                       | Reverse | TCTGTGCTACCCAACTTCAGT            |
| Human YTHDF3          | Forward | ACAAGTGGATCTCAGGGAC              |
|                       | Reverse | GCTGAGGCTGCTGGATTAT              |
| Human ICAM1           | Forward | ATGCCCAGACATCTGTGTCC             |
|                       | Reverse | GGGGTCTCTATGCCCAACAA             |
| mouse Ythdf2          | Forward | GAGCAGAGACCAAAAGGTCAAG           |
|                       | Reverse | CTGTGGGCTCAAGTAAGGTTC            |
| mouse Il6             | Forward | TAGTCCTTCCCTACCCCAATTTCC         |
|                       | Reverse | TTGGTCCTTAGCCACTCCTTC            |
| Primers of ChIP-qPCR  |         |                                  |
| Human IL-6            | Forward | ACTTCGTGCATGACTTCAGC             |
|                       | Reverse | GCGGATCATGCTTTCTGTTGCCATGGTGTGTC |
| Human CCL22           | Forward | CAGTCTTGAAGACTTGGAGTCTAGGATC     |
|                       | Reverse | GATGGTGGGAGGGCAGCACC             |
| Human IL-12B          | Forward | TGTGTCTGTATGAAATGTGCATGGGTG      |
|                       | Reverse | TGAGATGAAGGGCAAAGGGTTTAGTAC      |
| Human ICAM1           | Forward | TTGGCTAGATTGCGTCTCTTACAGTTTC     |
|                       | Reverse | CAGAGCCAAGTTCCCAAACCATCATGATC    |
| Human KDM6B           | Forward | ACCCCTATCTCTGCCCCCTG             |
|                       | Reverse | CTCCTTGGCCTGTGCGGG               |
| Primers of MeRIP-qPCR |         |                                  |
| Human KDM6B           | Forward | AGAAGAGATCAGCCGGGCTTG            |
|                       | Reverse | CAGCCTCCTCCTTGGCCTGTG            |
| Primers of RIP-qPCR   |         |                                  |
| Human KDM6B           | Forward | TGATGCTAAGCGGTGGAAG              |
|                       | Reverse | TGTTGATGTTGACGGAGCAG             |

Data file S1. YTHDF2 RNA-seq

Data file S2. YTHDF2 RIP-seq
